# Supplementary material for: Validation of verbal autopsy methods using hospital medical records: a case study in Vietnam
Source: PubMed Central journal article supplement (PMC5960129; doi:10.1186/s12874-018-0497-7), 2018-05-18
Supplement: 12874_2018_497_MOESM2_ESM.pdf [file 12874_2018_497_MOESM2_ESM.pdf]

## INTERNATIONAL FORM OF MEDICAL CERTIFICATE OF CAUSE OF DEATH

| Cause of death                                                                                                                                                                                                                                                                                                                                                                                                                                                                                                                                                                                              | Approximate interval between onset and death                                  |
|-------------------------------------------------------------------------------------------------------------------------------------------------------------------------------------------------------------------------------------------------------------------------------------------------------------------------------------------------------------------------------------------------------------------------------------------------------------------------------------------------------------------------------------------------------------------------------------------------------------|-------------------------------------------------------------------------------|
| <p><b>I</b></p> <p>Disease or condition directly leading to death*</p> <p style="margin-left: 150px;">(a) .....</p> <p style="margin-left: 150px;">due to (or as a consequence of)</p> <p><b>Antecedent causes</b></p> <p>Morbid conditions, if any, giving rise to the above cause, stating the underlying condition last</p> <p style="margin-left: 150px;">(b) .....</p> <p style="margin-left: 150px;">due to (or as a consequence of)</p> <p style="margin-left: 150px;">(c) .....</p> <p style="margin-left: 150px;">due to (or as a consequence of)</p> <p style="margin-left: 150px;">(d) .....</p> | <p>.....</p> <p>.....</p> <p>.....</p> <p>.....</p> <p>.....</p> <p>.....</p> |
| <p><b>II</b></p> <p>Other significant conditions contributing to the death, but not related to the disease or condition causing it</p> <p style="margin-left: 150px;">.....</p> <p style="margin-left: 150px;">.....</p>                                                                                                                                                                                                                                                                                                                                                                                    | <p>.....</p> <p>.....</p>                                                     |
| <p><i>*This does not mean the mode of dying, e.g. heart failure, respiratory failure. It means the disease, injury, or complication that caused death.</i></p>                                                                                                                                                                                                                                                                                                                                                                                                                                              |                                                                               |

(This form is extracted from *International statistical classification of diseases and related health problems. - 10th revision. Volume 2 - Instruction manual. Fifth edition.*

Further information on explanation of this form can be found at page 204-206 of this book [http://apps.who.int/classifications/icd10/browse/Content/staichtml/ICD10Volume2\\_en\\_2016.pdf](http://apps.who.int/classifications/icd10/browse/Content/staichtml/ICD10Volume2_en_2016.pdf).)
