# Supplementary material for: Validation of verbal autopsy methods using hospital medical records: a case study in Vietnam
Source: PubMed Central journal article supplement (PMC5960129; doi:10.1186/s12874-018-0497-7), 2018-05-18
Supplement: 12874_2018_497_MOESM3_ESM.pdf [file 12874_2018_497_MOESM3_ESM.pdf]

**Table 3.1. Validity of the VA diagnosis on causes of death by age 25-69 years**

|                                                            | ICD10 codes                          | True Positive | True Negative | Medical records | Verbal Autopsy | Sensitivity 95% CI | Specificity 95% CI | PPV 95% CI  |
|------------------------------------------------------------|--------------------------------------|---------------|---------------|-----------------|----------------|--------------------|--------------------|-------------|
| <b>CANCER</b>                                              |                                      |               |               |                 |                |                    |                    |             |
| Lung cancer                                                | C34                                  | 4             | 59            | 4               | 4              | 100                | 100                | 100         |
| Liver cancer                                               | C22                                  | 5             | 56            | 5               | 7              | 100                | 97 (92-100)        | 71 (38-100) |
| Colon and rectum cancers                                   | C18-C21                              | 2             | 61            | 2               | 2              | 100                | 100                | 100         |
| Mouth and oropharynx cancers                               | C00-C14                              | 3             | 59            | 4               | 3              | 75 (33-100)        | 100                | 100         |
| Oesophagus cancer                                          | C15                                  | 3             | 60            | 3               | 3              | 100                | 100                | 100         |
| Stomach cancer                                             | C16                                  | 1             | 62            | 1               | 1              | 100                | 100                | 100         |
| Pancreas cancer                                            | C25                                  | 2             | 61            | 2               | 2              | 100                | 100                | 100         |
| <b>CADIOVASCULAR DISEASES</b>                              |                                      |               |               |                 |                |                    |                    |             |
| Stroke                                                     | I60-I69                              | 4             | 53            | 6               | 8              | 67 (29-100)        | 93 (86-100)        | 50 (15-85)  |
| Ischaemic heart disease                                    | I20-I25                              | 1             | 61            | 1               | 2              | 100                | 98 (95-100)        | 50 (0-100)  |
| <b>OTHER NON COMMUNICABLE DISEASES AND EXTERNAL CAUSES</b> |                                      |               |               |                 |                |                    |                    |             |
| Diabetes mellitus                                          | E10-E14                              | 0             | 60            | 2               | 1              | 0                  | 98 (95-100)        | 0           |
| Cirrhosis of liver                                         | K70, K74                             | 1             | 58            | 4               | 2              | 25 (0-67)          | 98 (95-100)        | 50 (0-100)  |
| Road traffic Injury                                        | V01-V04, V06, V09-V80, V87, V89, V99 | 3             | 60            | 3               | 3              | 100                | 100                | 100         |
| <b>COMMUNICABLE DISEASES</b>                               |                                      |               |               |                 |                |                    |                    |             |
| HIV/AIDS                                                   | B20-B24                              | 2             | 60            | 3               | 2              | 67 (13-100)        | 100                | 100         |
| Pneumonia J18                                              | J12-J18                              | 0             | 59            | 2               | 2              | 0                  | 97 (92-100)        | 0           |
| <b>OTHER CAUSES</b>                                        |                                      |               |               |                 |                |                    |                    |             |
| <b>Total</b>                                               |                                      | <b>38</b>     |               | <b>63</b>       | <b>63</b>      |                    |                    |             |

**Table 3.2. Validity of the VA diagnosis on causes of death by age 70+ years**

|                                                            | ICD10 codes                          | True Positive | True Negative | Medical records | Verbal Autopsy | Sensitivity 95% CI | Specificity 95% CI | PPV 95% CI  |
|------------------------------------------------------------|--------------------------------------|---------------|---------------|-----------------|----------------|--------------------|--------------------|-------------|
| <b>CANCER</b>                                              |                                      |               |               |                 |                |                    |                    |             |
| Lung cancer                                                | C34                                  | 4             | 48            | 4               | 4              | 100                | 100                | 100         |
| Liver cancer                                               | C22                                  | 1             | 51            | 1               | 1              | 100                | 100                | 100         |
| Colon and rectum cancers                                   | C18-C21                              | 2             | 50            | 2               | 2              | 100                | 100                | 100         |
| Stomach cancer                                             | C16                                  | 1             | 51            | 1               | 1              | 100                | 100                | 100         |
| <b>CADIOVASCULAR DISEASES</b>                              |                                      |               |               |                 |                |                    |                    |             |
| Stroke                                                     | I60-I69                              | 10            | 35            | 12              | 15             | 83 (62-100)        | 88 (77-98)         | 67 (43-91)  |
| Ischaemic heart disease                                    | I20-I25                              | 2             | 43            | 8               | 3              | 25 (0-55)          | 98 (93-100)        | 67 (13-100) |
| <b>OTHER NON COMMUNICABLE DISEASES AND EXTERNAL CAUSES</b> |                                      |               |               |                 |                |                    |                    |             |
| Diabetes mellitus                                          | E10-E14                              | 2             | 45            | 3               | 6              | 67 (13-100)        | 92 (84-100)        | 33 (0-71)   |
| COPD                                                       | K70, K74                             | 1             | 46            | 6               | 1              | 17 (0-46)          | 100                | 100         |
| Cirrhosis of liver                                         | J40-J44                              | 1             | 51            | 1               | 1              | 100                |                    | 100         |
| Road traffic Injury                                        | V01-V04, V06, V09-V80, V87, V89, V99 | 1             | 51            | 1               | 1              | 100                | 100                | 100         |
| Communicable disease: Pneumonia                            | J12-J18                              | 2             | 43            | 4               | 7              | 50 (1-99)          | 90 (81-98)         | 29 (0-62)   |
| <b>OTHER CAUSES</b>                                        |                                      |               |               |                 |                |                    |                    |             |
|                                                            |                                      | 1             | 34            | 9               | 10             |                    |                    |             |
| <b>Total</b>                                               |                                      | <b>28</b>     |               | <b>52</b>       | <b>52</b>      |                    |                    |             |
